# Supplementary material for: Attenuated muscle regeneration is a key factor in dysferlin-deficient muscular dystrophy
Source: PubMed Central journal article supplement — Hum Mol Genet. 2009 Mar 13;18(11):1976–89. doi: 10.1093/hmg/ddp121 (PMC2678929; doi:10.1093/hmg/ddp121), 2009-03-13

**Supplemental Figure 1: Confirmation of defective neutrophil recruitment and muscle regeneration in the  $Dysf^{tm1-Kcam}$  mouse strain**

A) C57BL/10 and  $Dysf^{tm1-Kcam}$  mice were injected with notexin and muscle harvested after seven days of regeneration, sectioned and stained with haematoxylin and eosin. The  $Dysf^{tm1-Kcam}$  muscle showed delayed and attenuated muscle regeneration with poor clearance of necrotic fibres. Scale bar 50 $\mu$ m. B) Muscle was harvested six hours post needle wounding, sectioned and stained for Ly6G to detect neutrophils. Needle wounding of  $Dysf^{tm1-Kcam}$  muscle (n=4) showed fewer neutrophils recruited to the site of injury six hours after wounding. Scale bar 100 $\mu$ m. C) Neutrophil counts normalised by wound area for the C57BL/10, C57BL/10.SJL-*Dysf* and  $Dysf^{tm1-Kcam}$  strains after needle wounding as above shows a significant ( $p < 0.02$ ) reduction in the neutrophil count in both C57BL/10.SJL-*Dysf* and  $Dysf^{tm1-Kcam}$ .

A

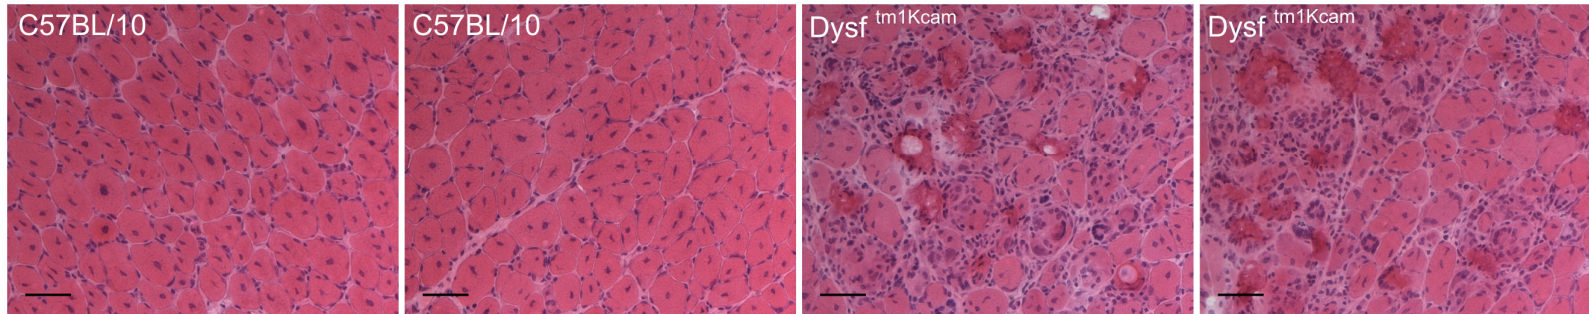

B

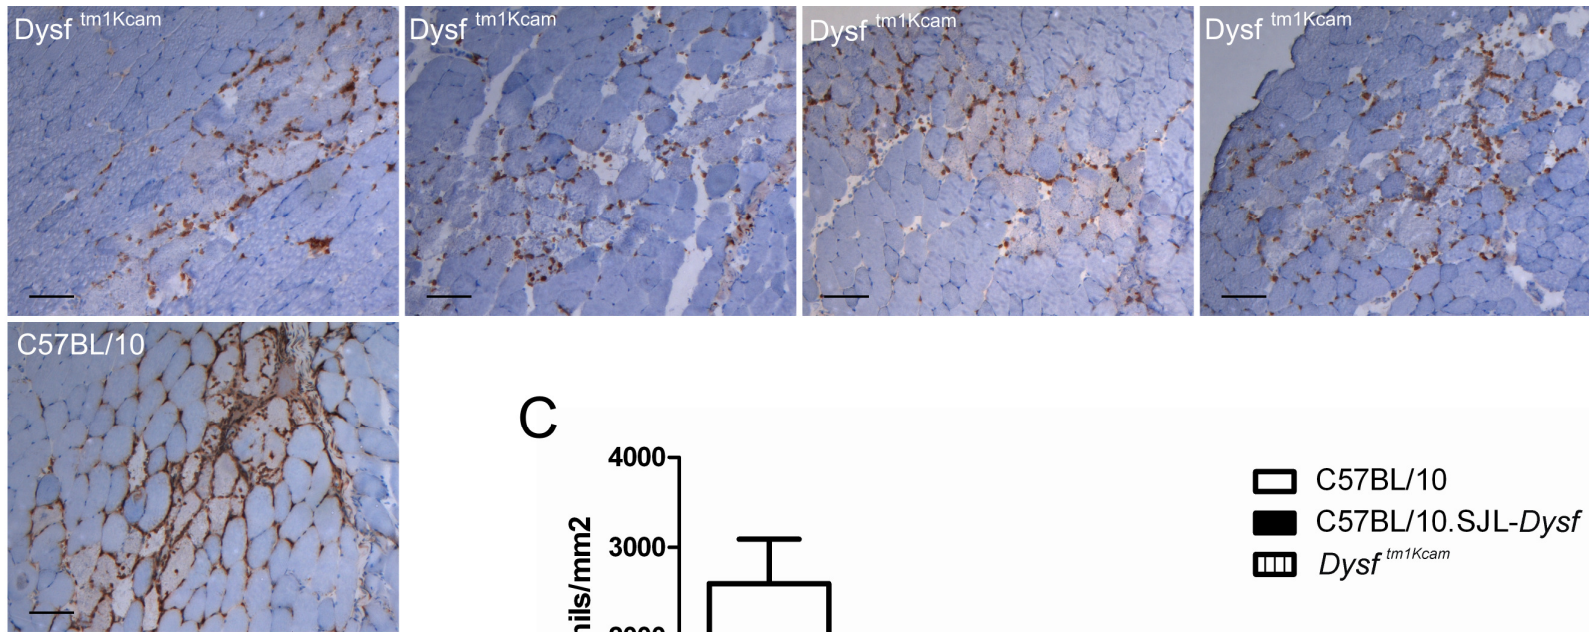

C

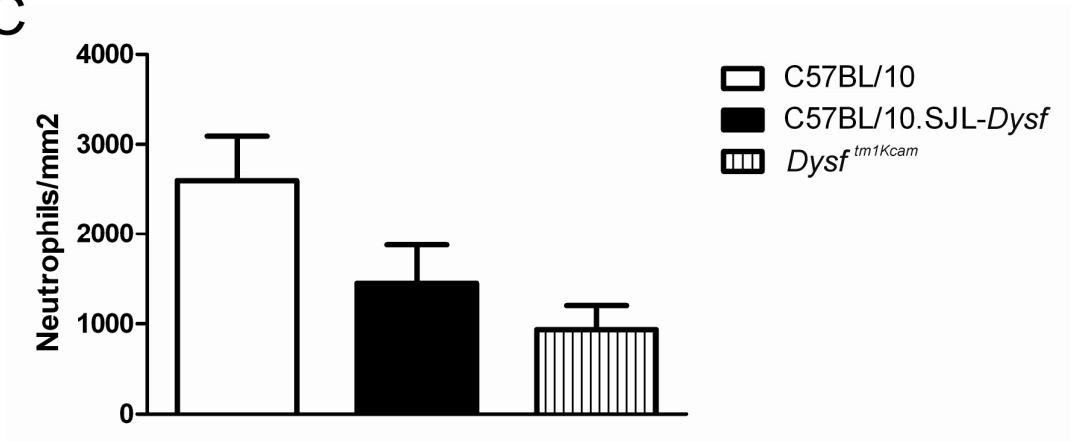

Supplement: ddp121_1.pdf [file ddp121_1.pdf]
